# Supplementary material
Source: HighWire-hosted journal article supplement (https://gut.bmj.com/content/67/12/2213)
Supplement: inline-supplementary-material-1 [file inline-supplementary-material-1.xlsx]

## Sheet: in article (2)
Ref.	Subjects	Diet information	In/exclusion criteria	Medication use (number of subjects)	Determination of frailty	Microbiological methods	Main findings with increased age
Gavini 2001 [1]	15 children (3-15y)	Not reported	Not reported	Not reported	Not reported	Culture	↓Bifidobacterium prevalence
France	17 young adults (30-46y)						↓Bifidobacterium pseudocatenulatum prevalence
	22 elderly (69-89y)						↑Bifidobacterium adolescentis prevalence,↑Proteus prevalence, ↑Citrobacter freundii prevalence
Hopkins 2001 [2]	10 children (16 months-7y)	Not reported	No gastrointestinal complaints < 2 months	Metronidazole (4 CDAD elderly)	Not reported	Culture	↓total anaerobes, ↓Bifidobacterium, ↓Lactobacillus
UK	7 young adults (21-34 y)		No antibiotics < 2 months			Cellular fatty acid profiling	↑enterobacteria
	5 elderly (67-88y)					16S rRNA abundance measurement	CDAD vs healthy elderly, ↓total bacteria, ↓Bifidobacterium
	4 CDAD elderly (68-73y)						CDAD vs healthy elderly, ↑enterobacteria, ↑Clostridium, ↑Lactobacillus, ↑enterococci
Hopkins 2002 [3]	7 young adults (21-34y)	Not reported	No gastrointestinal complaints < 2 months	Metronidazole (4 CDAD elderly)	Not reported	Culture	↓Bifidobacterium, ↓Lactobacillus
UK	4 elderly (67-88y)		No antibiotics < 2 months			Cellular fatty acid profiling	CDAD vs healthy elderly, ↓ Bifidobacterium, ↓Prevotella, ↓Bacteroides
	4 CDAD elderly (67-73y)						CDAD vs healthy elderly, ↑Clostridium diversity, ↑Lactobacillusdiversity
Bartosch 2004 [4]	35 elderly (63-90y)	Hospitalized elderly consuming hospital diet	Antibiotic & hospitalized elderly: nongut infections	One or multi-antibiotics (21 antibiotic treated elderly)	Not reported	16S rRNA gene-based qPCR	Hospitalized vs healthy elderly, ↓total bacteria, ↓ Bacteroides-Prevotella group
UK	38 hospitalized elderly (66-103y)	Community elderly consuming their habitual diet	Hospitalized elderly: no antibiotics < 2 months				Hospitalized vs healthy elderly, ↓Clostridium clostridiiforme, ↓Faecalibacterium prausnitzii
	21 antibiotic & hospitalized elderly (65-100y)		No gastrointestinal disease history				Antibiotic treated vs healthy elderly, ↑Enterococcus faecalis
							Antibiotic treated vs healthy elderly, ↓total bacteria, ↓Bacteroides-Prevotella group
							Antibiotic treated vs healthy and hospitalized elderly, ↓Bifidobacterium, ↓Desulfovibrio
							Antibiotic treated vs healthy and hospitalized elderly, ↓Clostridium butyricum, ↓Clostridium clostridiiforme
							Antibiotic treated vs healthy and hospitalized elderly, ↓Ruminococcus albus, ↓Faecalibacterium prausnitzii
							Enterobacteriaceae, healthy elderly ≈ hospitalized elderly ≈ antibiotic & hospitalized elderly
Woodmansey 2004 [5]	12 young adults (19-35y)	Not reported	No steroids, immunosuppressives, acetylsalicylic acid or motility stimulating drugs	Not reported	Not reported	Culture	↑Streptococcus, ↑eubacteria
UK	6 elderly (67-75y)					Cellular fatty acid profiling	↓Bacteroides, ↓Prevotella, ↓Lactobacillus
	10 hospitalized elderly (73-101y)		Not terminally ill, dysphagia, severe dementia				↓Clostridium, ↓Bifidobacterium, ↓number of amylolytic bacteria
			No antibiotics < 8 weeks				Total anaerobes, young adults ≈ healthy elderly ≈ hospitalized elderly
							enterobacteria, young adults ≈ hospitalized elderly < healthy elderly
							Hospitalized vs elderly, ↓Bifidobacterium, ↓Streptococcus diversity
							Hospitalized vs elderly, ↑Lactobacillus, ↑Clostridium diversity, ↑facultative anaerobes
							Level of ammonia, healthy young > healthy elderly > hospitalized elderly
van Tongeren 2005 [6]	23 frail elderly (70-100y) including :	All volunteers were supplied with the same food menu	No antibiotics < 4 weeks	Not reported	Groningen frailty indicator	16S rRNA-based FISH	Increased frailty, ↓Lactobacillus/ Enterococcus group, ↓Faecalibacterium prausnitzii
The Netherlands	13 low frailty score (1-4)						Increased frailty, ↓Bacteroides/Prevotella group
	10 high frailty score (>5)						Increased frailty, ↑Enterobacteriaceae
Mueller 2006 [7]	France: 22 young adults (20-50y); 26 elderly (>60y)	No extreme diet (vegan, total fasting or high alcohol)	No antibiotics, sulfonamides, corticoid < 3 months	Not reported	Not reported	16S rRNA-based FISH + flow cytometry	↓Bifidobacterium (location independent)
France	Germany: 22 young adults (20-50y); 37 elderly (>60y)		No immunosuppressive agents < 3 months				↑enterobacteria (location independent)
Germany	Italy: 20 young adults (20-50y); 39 elderly (>60y)		No gastrointestinal disorders				Lactobacillus-Enterococcus, France (↑), Germany(↑), Italian (≈) and Sweden (≈)
Italy	Sweden: 20 young adults(20-50y); 39 elderly(>60y)		No hypercholesterolemia				Streptococcus, Germany (↑), Italy (↓), Sweden (≈), France (≈)
Sweden							Bacteroides, Italian (↓), France (↓), Sweden (↓), German (↑)
Collado 2007 [8]	150 infants (1 -12months)	Not reported	Not reported	Not reported	Not reported	16S rRNA-based FISH + flow cytometry	↓Akkermansia muciniphila
Finland	54 young adults (25-35y)					16S rRNA gene-based qPCR
	45 elderly (80-82y)
Tiihonen 2008 [9]	14 young adults (21-39y)	Habitual diet	No critical illness, IBD and major malignancies	NSAID (26 NSAID elderly)	Not reported	Culture	No significant ageing effect on Bacteroides, Bifidobacterium, Faecalibacterium prausnitzii level
Finland	26 elderly NSAID users (70-88y)	Provided meal service at least once per day (most of volunteers)	No probiotic or prebiotic during the study	NSAIDs (> 2 times per week)		Flow cytometry	NSAID elderly vs young adults: ↓total SCFAs, ↓butyric acid, ↓propionic acid
	29 elderly non-NSAID users (68-84y)		No antibiotics < 2 months			16S rRNA gene-based qPCR	NSAID elderly vs young adults: ↓Clostridium coccoides-Eubacterium rectale
						16S rRNA-based FISH	NSAID vs non-NSAID elderly: ↓dry matter, ↓isovaleric acid, ↓isobutyric acid
							↑isobutyric acid, ↑Isovaleric acid, ↑isocapronic acid
							↓propionic acid
Mariat 2009 [10]	21 infants (3 weeks-10 months)	Unrestricted western diet (adult and elderly)	No antibiotics < 3 months (adult and elderly)	Not reported	Not reported	16S rRNA gene-based qPCR	↓Escherichia coli
France	21 young adults (25-45y)	Fomula feeding (7 infants)	No drugs influencing the microbiota < 3 months				↑Clostridium leptum, ↑Clostridium coccoides
	20 elderly (70-90y)	Breast feeding (16 infants)	No metabolic and gastrointestinal diseases				≈ Bifidobacterium
			No history of antibiotics (infants)				Firmicutes/Bacteroidetes ratio in infants, adults and elderly respectively (0.4, 10.9 and 0.6)
Zwielehner 2009 [11]	17 young adults (18-31y)	Typical central European diet (young aults)	No antibiotics or chemotherapeutic treatment < 3 months	NSAIDs (elderly, on demand)	Not reported	PCR-DGGE	Institutionalized elderly: ↓total bacteria, ↓bacterial diversity, ↓Bifidobacterium, ↓Clostridium cluster IV
Austria	17 institutionalized elderly (78-94y)	Not reported (elderly)	No gastrointestinal disease			16S rRNA gene-based qPCR	Institutionalized elderly: ↑Bacteroides
			No pregnancy			16S rRNA gene cloning and sequencing
Rajilic 2009 [12]	5 young adults (mean 33y)	Not reported	Not reported	Not reported	Not reported	Phylogenetic microarray	Overall microbiota composition of your adults and elderly were significantly different
Not reported	5 elderly (mean 71y)					16S rRNA-based FISH	↓Bacteroidetes (Allistipes, Bacteroides ovatus et rel., ,Bacteroides splachnicus et rel , Parabacteroides)
							↓Bacteroidetes (Prevotella ruminicola et rel, Eubacterium hallii et rel)
							↑Bacilli (Lactobacillus salivarius et rel., Aerococcus, Granulicatella)
							↑Bacilli (Streptococcus bovis et rel, Streptococcus intermedius et rel.)
Biagi 2010 [13]	20 young adults (25-40y)	Not reported	No malignant neoplasis and/or immunosuppressive drugs	Medication use (43 elderly and 21 centenarians)	Not reported	Phylogenetic microarray	Age groups explained 6.1% of the total microbiota variation
Italy	22 elderly (63-76y) offspring of mean age 59.3y parents		No antibiotics < 1 month			16S rRNA gene-based qPCR	Differences between centenarians and other groups were bigger than differences between young and elderly
	21 elderly (59-78y) offspring of centenarians		Medication free (young adults)				Bifidobacterium: centenarians ≈ elderly < young adults (qPCR); centenarians ≈ elderly ≈ young adults (HitChip)
	21 centenarians (99-104y)						↑Proteobacteria, ↑Eubacterium limosum,↑Bacilli (no significant differences beetween young and elderly)
							↓microbial diversity (no significant differences between young and elderly)
							↓Faecalibacterium prausnitzii (no significant differeces between young and elderly)
							↓Clostridium cluster XIVa (no significant differences between young and elderly)
							Centenarians and their offsprings vs elderly and young adults, ↑Fusobacteria and Preoteobacteria prevalence
Mäkivuokko 2010 [14]	14 young adults (21-39y)	Habitual diet	No diarrhoea, IBD, coeliac disease, major malignancies	NSAIDs (> 2 times per week)	Not reported	16S rRNA gene cloning and sequencing	↓ Firmicutes, ↓Rumicococcus, ↓Roseburia, ↓Coprobacillus, ↓Dialister
Finland	9 elderly NSAID users (77-85y)	Provided meal service at least once per day (most of volunteers)		Medications use (18 elderly)		G+C% profiling	↑Bacteroidetes, ↑Oscillospira, ↑Lactobacillus, ↑Clostridium, ↑Streptococcus, ↑Bacteroides
	9 elderly non-NSAID users (70-83y)						NSAID vs non-NSAID elderly, ↓Lactobacillus, ↓Actinobacteria, ↓Collinsella,↑unclassified Firmicutes
Štšepetova 2011 [15]	24 young adults (23-31.5y)	Western type diet	No NSAID drugs, alcohol abuse, special diet, diabetes, malignancy	Not reported	Not reported	Culture	↑Lactobacillus
Estonia	37 elderly (68-75.2y)		No gastrointestinal disorders, antibiotics < 2 months			qPCR assays	↑Lactobacillus paracasei prevalence, ↑Lactobacillus reuteri prevalence, ↑Lactobacillus plantarum prevalence
			No gastrointestinal surgery < 4 weeks				↓Lactobacillus acidopbilus, ↓Lactobacillus helveticus prevalence
			No chronic renal or hepatic failure				Lactobacillus rhamnosus were not detected in elderly
Vollmerhausen 2011 [16]	30 young adults (20-45y)	Not reported	No symptomatic urinary tract infection	Not reported	Not reported	Phenotype charactication	↑Escherichia coli
Australia	29 elderly (65-79y)		No antibiotics or probiotics < 3 month			RAPD	↑Escherichia coli with uropathogenic property prevalence
			No pregnancy
Hippe 2011 [17]	15 young vegetarians (26±5y)	Central European diet	Not reported	Not reported	Not reported	qPCR assays	↓Clostridium cluster XIVa
Austria	17 young omnivores (24±2.5y)						↓butyryl-CoA:acetate CoA-transferase gene number
	15 institutionalized elderly (86±8y)
Claesson 2011 [18]	9 young adults (28-46y)	Not reported	No advanced organic disease	Antibiotics (43 out of 161 elderly)	Not reported	16S rRNA gene based pyrosequencing	↓Clostridium XIVa
Ireland	161 elderly (65-96y)		No alcohol abuse				↑Faecalibacterium, ↑Allistipes, ↑Roseburia, ↑Parabacteroides, ↑Clostridium IV
Claesson 2012 [19]	13 young adults (28-46y)	Habitual diet (assessed by food frequency questionnaire)	Not involved in medication intervention	Long&short-term hospitalized and outpatients elderly received medication	Functional independence measure	16S rRNA gene based pyrosequencing	Clustering of subjects by diet, residence location, or thealth status
Ireland	178 elderly (64-102y) including:		No antibiotics < 30 days		Barthel index	Shortgun metagenomic sequencing	Diversity of the microbiota is highest in community dwellers, followed by institutionalizedelderly, lowest in long-term hospitalized
	83 community dwellers		No alcohol abuse			NMR spectroscopy	Increased frailty, ↓Ruminococcus CAG, ↓Prevotella, ↓Oscillibacter CAG
	20 outpatients elderly						Increased frailty, ↓acetate, ↓butyrate, ↓propionate
	15 short-term hospitalized						Increased frailty, ↑Bacteroides CAG
	60 long-term hospitalized
Rea 2012 [20]	123 community dwellers (>65y)	Not reported	Not involved in medication intervention	Antibiotics < 4 weeks	Not reported	Culture	Carriage rate of Clostridium difficile, long-term hospitalized > outpatients > short-term hospitalized > community dweller
Ireland	43 outpatients (>65y)		No advanced organic disease			16S rRNA gene based pyrosequencing	Clostridium difficile positive vs negative elderly, ↓Enterococcus, ↓Leuconostoc
	48 short-term hospitalized (>65y)		No alcohol abuse				Clostridium difficile positive vs negative elderly, ↑Enterobacteriaceae, ↑Aerococcus, ↑Weeksella
	103 long-term hospitalized (>65y)						Clostridium difficile positive vs negative elderly, ↑Anaerococcus, ↑Helcococcus
Drago 2012 [21]	10 young adults (24-57y)	Not reported	No proton-pump inhibitors use < 1 month	Not reported	Not reported	Culture	Centenarians vs young adults, ↓total anaerobes, ↓Enterobacteriaceae, ↓Bifidobacterium, ↓Bacteroides
Italy	14 centenarians (100-104y)		No antibiotics, antidiarrheric medicines			16S rRNA gene based pyrosequencing	Centenarians vs young adults, ↑Clostridium
			No IBD or metabolic diseases				Level of Lactobacillus, centenarians ≈ young adults
			No probiotics < 1 month				Lactobacillus reuteri, Lactobacillus johnsonni, Lactobacillus rhamnosus in centernarians not in adults
							Lactobacillus fermentum, Lactobacillus plantarum, Lactobacillus paralimentarius in adults, not in centernarians.
							Bifidobacterium pseudocatenulatum, Bifidobacterium catenulatum in adults, not in centernarians
O’Sullivan 2012 [22]	73 community dwellers (65-95y)	Habitual diet (assessed by food frequency questionnaire)	Long-term hospitalized (> 6 weeks)	42 subjects receiving antibiotics < 1 month	Not reported	Culture	↓Bifidobacterium richness after antibiotic intake, especially after nucleic acid synthesis inhibitors intake
Ireland	40 outpatients elderly (65-95y)		Short-term hospitalized (< 6 weeks)	Long-term stay: 16 of 48 received antibiotics		16S rRNA gene based pyrosequencing	Antibiotic treated elderly, ↓Faecalibacterium, ↑Bacteroidetes, vs non-antibiotic elderly
	24 short-term hospitalized (65-95y)			Short-term stay: 10 of 24 received antibiotics			Short-term hospitalized vs non-antibiotic elderly: antibiotic treated elderly, ↓Blautia, ↓Faecalibacterium
	48 long-term hospitalized (65-95y)			Outpatients elderly: 7 of 40 receivedd antibiotics			Short-term hospitalized vs non-antibiotic elderly: antibiotic treated elderly, ↑Lactobacillus, ↑Mogibacterium, ↑Moryella
				Community dwellers: 9 of 75 received antibiotics			Short-term hospitalized vs non-antibiotic elderly: antibiotic treated elderly, ↑Peptoniphilus, ↑Victivallis, ↑Weissella
							Community vs non-antibiotic elderly: antibiotic treated elderly, ↑Euryarchaeota, ↑Rhodocyclaceae
							Community vs non-antibiotic elderly: antibiotic treated elderly, ↓Firmicutes, ↓Proteobacteria
							Long-term hospitalized vs non-antibiotic elderly: antibiotic treated elderly, ↓Lachnospiraceae
Rampelli 2013 [23]	1 young adults (38y)	Not reported	No malignant neoplasia and/or immunosuppressives	Elderly and centenarians received medication treatment	Not reported	Phylogenetic microarray	Elderly vs centenarians and young adults, ↑Faecalibacterium, ↑Eubacterium, ↑Bifidobacterium
Italy	5 elderly (59-75y)		Medication free (young adults)			Shortgun metagenomic sequencing	Centenarians vs young adults and elderly, ↑Escherichia, ↑Ruminococcus
	3 centenarians (99-102y)		No antibiotics < 1 month			NMR/MS	↓genes for short chain fatty acid production, ↓saccharolytic potential
							↑proteolytic functions
Wang 2015 [24]	8 centenarians (100-108y)	Rural elderly and centenarians had high fiber diet	No gastrointestinal disorders, hypertension, diabetes	Not reported	Not reported	16S rRNA gene based Illumina MiSeq	Intestinal microbiota was dominated by Bacteroidetes
China	8 rural elderly (85-99y)	Urban elderly had low carbohydrate and low fiber diet	No antibiotics or probiotics < 1 month				Microbial diversity: centenarians ≈ rural elderly ≈ urban elderly
	8 urban elderly (80-92y)		No systemic diseases				Microbial richness: centenarians ≈ rural elderly > urban elderly
							Enterobacteriaceae and Escherichia, centenarians ≈ rural elderly > urban elderly
							Lactobacillus, rural elderly > urban elderly ≈ centenarians
							Faecalibacterium, rural elderly ≈ urban elderly > centenarians
							Mitsuokella, rural elderly > urban elderly > centenarians
Odamaki 2016 [25]	367 community dwellers (0-104y)	Not reported	All volunteers are community dwellers (except 2)	Not reported	Not reported	16S rRNA gene based Illumina MiSeq	Elderly intestinal microbiota was dominited by Firmicutes
Japan							↓Firmicutes, ↓Actinobacteria
							↑alpha diversity and richness until centenarians (with large inter-individual differences)
							↑Bacteroidetes, ↑Proteobacteria, ↑Bacteroides and [Eubacterium] CAG
Biagi 2016 [26]	15 young adults (22-48y)	Habitual diet ((super) centenarians)	Physical and cognitive healthy ((super)centenarians)	(super)Centenarians received a variety of medications	Not reported	16S rRNA gene based Illumina MiSeq	Four age groups significantly separate from each other, except for cetenarians and super cetenarians
Italy	15 elderly (65-75y)		Physical and cognitive healthy (centenarians)				↓dominating families (Bacteroidaceae, Lachnospiraceae and Ruminococcaceae) accumulative abundance
	15 centenarians (99-104y)		Healthy and medication free (young adults)				↓Bifidobacterium, except for centenarians aged > 105y (↑)
	24 (super)centenarians (105-109y)						↓Coprococcus, Roseburia and Faecalibacterium
							↑Akkermansia and Christensenellaceae
Jackson 2016 [27]	728 community dwellers (42-86y)	Detailed informaiton provided in a separate article	Detailed informaiton provided in a separate article	Detailed information provided in an separate article	Rockwood frailty Index	16S rRNA gene based Illumina MiSeq	↓microbial diversity and richness,
UK							Increased frailty: ↓Faecalibacterium, especially Faecalibacterium prausnitzii
							Increased frailty: ↓a sub-set of Lachnospiraceae OTUs
							Increased frailty: ↑Eubacterium,↑Eggerthella, ↑Eubacterium dolichum
							Increased frailty: ↑Eggerthella lenta, ↑13 Enterobacteriaceae OTUs
Kong 2016 [28]	47 young adults (24-64y)	Not reported	None of volunteers were hospitalized	Not reported	Functional independence measure	16S rRNA gene based Illumina MiSeq	Long living vs young adults and elderly, ↑microbial richness
China	54 elderly (65-83y)						Long living vs young adults and elderly, ↑Blautia, Clostridium XIVa, Faecalibacterium, Escherichia Shibacterium
	67 long living elderly (90-102y)						Long living vs young adults and elderly, ↑Ruminococcaceae, unclassified Lachnospiraceae and Ersipelotrichaceae
Jeffery 2016 [29]	13 young adults (28-46y)	Habitual diet (assessed by food frequency questionnaire)	Not involved in medication intervention	Antibiotic intake were recorded, but not reported	Functional independence measure	16S rRNA gene based pyrosequencing	The microbiota of community dwellers were disturbanced by antibiotics stronger than that of long-term hospitalized elderly
Ireland	371 elderly (64-102y)		No antibiotics < 1 month (young adults)		Barthel index		Long-term hospitalized vs community-living elderly, after antibiotic intake: less recovery
			No advanced organic disease				Increased frailty: ↓alpha diversity
			No alcohol abuse				Increased frailty: ↑alpha diversity
Ticinesi 2017 [30]	76 hospitalized elderly (71-97y)	Hospitalized elderly have the same hospital-based diet	No expected survival < 30 days or having artifical nutrition	Hospitalized elderly: all polypharmacy (> 4 medications)	Rockwood frailty Index	16S rRNA gene based Illumina MiSeq	Frailty was not associated with microbial richness
Italy	25 elderly (65-87y)		No patients received antibiotics continuously > 3 days	Control elderly: no polypharmacy (< 5 medications)			Increased microbial richness, ↓drugs numbers, ↓motality
			Healthy elderly : no polypharmacy (< 5 drugs)	40 of 76 received antibiotics			Increased frailty, ↑Fonticella,↑Prevotella
			Hospitalized elderly have multimorbidity burden				Increased frailty, ↑unclassified member of Clostridiaceae 1 family
			No acute or chronic digestive diseases				Increased frailty, ↑Oscillospira, ↑Peptococcus, ↑Porphyromonas
							Increased frailty, ↑unclassified member of Lachnospiraceae family
Bian 2017 [31]	378 children (3-14y)	Not reported	Young adults have long living parents or grandparents (>80y or 85y)	Not reported	Not reported	16S rRNA gene based Illumina MiSeq	No clear difference found between young adults (30y+) and centenarians
China	212 soldiers (19-24y)		No prescription medication or antibiotics < 3 months				↑microbial diversity between 30-79 years old
	221 young adults (19-50y)		No cardiovascular, gastrointestinal diesease history				Inter-individual difference: male > female
	86 elderly (60-79y)		No metabolic, respiratory diseases history				Larger inter individual differences in microbial diversity
	198 long living elderly (>94y)		No smoking and alcohol
			No onset disease
Kato 2017 [32]	441 individuals (0-104y)	Not reported	Volunteers (> 80y) were community dwellers	Not reported	Not reported	16S rRNA gene-based qPCR	Bifidobacterium longum present across age
Japan			Yougurt consumption < 2 times a week				Bifidobacterium dentium had higher prevalence in the elderly than the others
Maffei 2017 [33]	85 community dwellers (43-79y)	Not reported	Offsprings of nonagenarians	7 volunteers had antibiotic treatment < 6 months	34-item frailty index	16S rRNA gene based Illumina MiSeq	Chronological age did not correlate with microbial richness and eveness
US				13 volunteers had no antibiotic information < 6 months			Increased frailty, ↓microbial richness
							Increased frailty, ↓Paraprevotella, ↓Sutterella, ↓Rikenellaceae family OTU
							Increased frailty, ↑TM7 candidate-phylum OTU, ↑Coprobacillu, ↑Dialister
	↓ significant decrease	Elderly without addition refers to healthy elderly
	↑ significant increase	CDAD: Clostridium difficile-associated diarrhoea
	≈ not significantly different	CAG: co-abundance group
	y: years of age	NSAID: non-steroidal anti-inflammatory drugs
	UK: United Kingdom	FISH: fluorescence in situ hybridization
	US: United States	PCR-DGGE: Polymerase chain reaction-denaturing gradient gel electrophoresis
	NMR: Nuclear magnetic resonance	RAPD: Randomly amplified polymorphic DNA analysis
Bibliography
1 Gavini F, Cayuela C, Antoine J-M, et al. Differences in the distribution of bifidobacterial and enterobacterial species in human faecal microflora of three different (children, adults, elderly) age groups. Microb Ecol Health Dis 2001;13:40-45.
2 Hopkins M, Sharp R, Macfarlane G. Age and disease related changes in intestinal bacterial populations assessed by cell culture, 16S rRNA abundance, and community cellular fatty acid profiles. Gut 2001;48:198-205.
3 Hopkins M, Macfarlane G. Changes in predominant bacterial populations in human faeces with age and with Clostridium difficile infection. J Med Microbiol 2002;51:448-454.
4 Bartosch S, Fite A, Macfarlane GT, et al. Characterization of bacterial communities in feces from healthy elderly volunteers and hospitalized elderly patients by using real-time PCR and effects of antibiotic treatment on the fecal microbiota. Appl Environ Microbiol 2004;70:3575-3581.
5 Woodmansey EJ, McMurdo ME, Macfarlane GT, et al. Comparison of compositions and metabolic activities of fecal microbiotas in young adults and in antibiotic-treated and non-antibiotic-treated elderly subjects. Appl Environ Microbiol 2004;70:6113-6122.
6 van Tongeren SP, Slaets JP, Harmsen H, et al. Fecal microbiota composition and frailty. Appl Environ Microbiol 2005;71:6438-6442.
7 Mueller S, Saunier K, Hanisch C, et al. Differences in fecal microbiota in different European study populations in relation to age, gender, and country: a cross-sectional study. Appl Environ Microbiol 2006;72:1027-1033.
8 Collado MC, Derrien M, Isolauri E, et al. Intestinal integrity and Akkermansia muciniphila, a mucin-degrading member of the intestinal microbiota present in infants, adults, and the elderly. Appl Environ Microbiol 2007;73:7767-7770.
9 Tiihonen K, Tynkkynen S, Ouwehand A, et al. The effect of ageing with and without non-steroidal anti-inflammatory drugs on gastrointestinal microbiology and immunology. Br J Nutr 2008;100:130-137.
10 Mariat D, Firmesse O, Levenez F, et al. The Firmicutes/Bacteroidetes ratio of the human microbiota changes with age. BMC Microbiol 2009;9:123.
11 Zwielehner J, Liszt K, Handschur M, et al. Combined PCR-DGGE fingerprinting and quantitative-PCR indicates shifts in fecal population sizes and diversity of Bacteroides, bifidobacteria and Clostridium cluster IV in institutionalized elderly. Exp Gerontol 2009;44:440-446.
12 Rajilic-Stojanovic M, Heilig HG, Molenaar D, et al. Development and application of the human intestinal tract chip, a phylogenetic microarray: analysis of universally conserved phylotypes in the abundant microbiota of young and elderly adults. Environ Microbiol 2009;11:1736-1751.
13 Biagi E, Nylund L, Candela M, et al. Through ageing, and beyond: gut microbiota and inflammatory status in seniors and centenarians. PLoS One 2010;5:e10667.
14 Mäkivuokko H, Tiihonen K, Tynkkynen S, et al. The effect of age and non-steroidal anti-inflammatory drugs on human intestinal microbiota composition. Br J Nutr 2010;103:227-234.
15 Štšepetova J, Sepp E, Kolk H, et al. Diversity and metabolic impact of intestinal Lactobacillus species in healthy adults and the elderly. Br J Nutr 2011;105:1235-1244.
16 Vollmerhausen TL, Ramos NL, Gündoğdu A, et al. Population structure and uropathogenic virulence-associated genes of faecal Escherichia coli from healthy young and elderly adults. J Med Microbiol 2011;60:574-581.
17 Hippe B, Zwielehner J, Liszt K, et al. Quantification of butyryl CoA: acetate CoA-transferase genes reveals different butyrate production capacity in individuals according to diet and age. FEMS Microbiol Lett 2011;316:130-135.
18 Claesson MJ, Cusack S, O'Sullivan O, et al. Composition, variability, and temporal stability of the intestinal microbiota of the elderly. Proc Natl Acad Sci U S A 2011;108:4586-4591.
19 Claesson MJ, Jeffery IB, Conde S, et al. Gut microbiota composition correlates with diet and health in the elderly. Nature 2012;488:178-184.
20 Rea MC, O'Sullivan O, Shanahan F, et al. Clostridium difficile carriage in elderly subjects and associated changes in the intestinal microbiota. Clinical microbiology 2012;50:867-875.
21 Drago L, Toscano M, Rodighiero V, et al. Cultivable and pyrosequenced fecal microflora in centenarians and young subjects. J Clin Gastroenterol 2012;46:S81-S84.
22 O'sullivan O, Coakley M, Lakshminarayanan B, et al. Alterations in intestinal microbiota of elderly Irish subjects post-antibiotic therapy. J Antimicrob Chemother 2012;68:214-221.
23 Rampelli S, Candela M, Turroni S, et al. Functional metagenomic profiling of intestinal microbiome in extreme ageing. Aging 2013;5:902-912.
24 Wang F, Yu T, Huang G, et al. Gut Microbiota Community and Its Assembly Associated with Age and Diet in Chinese Centenarians. J Microbiol Biotechnol 2015;25:1195-1204.
25 Odamaki T, Kato K, Sugahara H, et al. Age-related changes in gut microbiota composition from newborn to centenarian: a cross-sectional study. BMC Microbiol 2016;16:90.
26 Biagi E, Franceschi C, Rampelli S, et al. Gut microbiota and extreme longevity. Curr Biol 2016;26:1480-85.
27 Jackson MA, Jeffery IB, Beaumont M, et al. Signatures of early frailty in the gut microbiota. Genome Med 2016;8:8.
28 Kong F, Hua Y, Zeng B, et al. Gut microbiota signatures of longevity. Curr Biol 2016;26:R832-R33.
29 Jeffery IB, Lynch DB, O'toole PW. Composition and temporal stability of the gut microbiota in older persons. ISME Journal 2016;10:170-182.
30 Ticinesi A, Milani C, Lauretani F, et al. Gut microbiota composition is associated with polypharmacy in elderly hospitalized patients. Sci Rep 2017;7:11102.
31 Bian G, Gloor GB, Gong A, et al. The Gut Microbiota of Healthy Aged Chinese Is Similar to That of the Healthy Young. mSphere 2017;2:e00327-17.
32 Kato K, Odamaki T, Mitsuyama E, et al. Age-Related Changes in the Composition of Gut Bifidobacterium Species. Curr Microbiol 2017:1-9.
33 Maffei VJ, Kim S, Blanchard IV E, et al. Biological aging and the human gut microbiota. The journals of gerontology Series A, Biological sciences and medical sciences 2017;72:1474-1482.
